# Supplementary material
Source: Springer Nature journal article supplement (https://www.springermedizin.de/resource/supplementary/13075_2013_4411_MOESM2_ESM.pdf/10110356)
Supplement: MOESM2 [file 10110356]

# STUDY 1

## Evaluation of Item Clarity, Importance, & Relevance by Mailed Questionnaire (n = 250)

Participants drawn from initial Participant Pool (Figure 1)

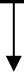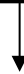

### Ceiling Items (n = 125)

Composed of 25 Group 1 participants with disability scores of 0.025 or lower and 100 participants from Group 3

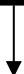

### Respondents

(n = 90)

### Floor Items (n = 125)

Composed of 25 Group 2 participants with disability scores 1.0 or higher and 100 participants from Group 3

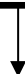

### Respondents

(n = 84)
